# Supplementary material for: Fabrication and characterization of an antibacterial chitosan/silk fibroin electrospun nanofiber loaded with a cationic peptide for wound-dressing application
Source: PubMed Central journal article supplement (PMC8403119; doi:10.1007/s10856-021-06542-6), 2021-08-28
Supplement: 10856_2021_6542_MOESM1_ESM.pdf [file 10856_2021_6542_MOESM1_ESM.pdf]

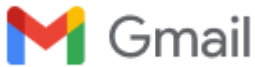

Mehrdad Moosazadeh Moghaddam &lt;mm.genetics@gmail.com&gt;

---

**Article processing charge for manuscript submitted to Journal of Materials Science: Materials in Medicine**

1 message

---

**SpringerOpen Accounts** <payments@springeropen.com>  
To: Mehrdad Moosazadeh Moghaddam <mm.genetics@gmail.com>

Fri, Jan 8, 2021 at 9:30 AM

MS: 8501238252039044

Fabrication and Characterization of an Antibacterial Chitosan/Silk Fibroin Electrospun Nanofiber Loaded with a Cationic Peptide for Wound-dressing Application

Mehrdad Moosazadeh Moghaddam, Sadjad Khosravimelal, Milad Chizari, Behrouz Farhadhosseinabadi and Mazaher Gholipourmalekabadi

Journal of Materials Science: Materials in Medicine

Dear Dr Moosazadeh Moghaddam

Thank you for agreeing the article processing charge for Journal of Materials Science: Materials in Medicine. I would like to update you regarding your status with respect to the article processing charge that is normally due if a manuscript is accepted.

I am pleased to say that a waiver has been granted on this occasion.

No payment is due on publication of this article.

The article processing charge has been waived by Springer Open.

Kind regards,

BioMed Central Limited

The Campus

[4 Crinan Street](#)

London N1 9XW

UK

Phone: +44 (0) 20 3192 2009

Email: [ORSupport@springernature.com](mailto:ORSupport@springernature.com)
